# Supplementary material
Source: PubMed Central journal article supplement (PMC3167233)
Supplement: NIHMS307113-supplement-1.pdf [file NIHMS307113-supplement-1.pdf]

**Supplementary Table: All biographical, language testing, lesion volume, and lesion load data.**

Abbreviations: G=Gender; Mo\_P = Months post stroke; Age\_T = age at testing; RCPM = Raven's Coloured Progressive Matrices Test (24 items, performance expressed as % correct of all); WPM = words per minute; %CIU = percent CIUs; CIU/m = CIUs per minute; BNT = Boston Naming Test (60 items, performance expressed as % correct of all); BDAE\_R = Repetition subtest of the BDAE (max performance=10); Les\_V = Lesion volume in cc; AF\_Vol = AF lesion load in cc; %AF = AF lesion load in %; EMC\_V = EMC lesion load in cc; %EMC = EMC lesion load in %; UF\_V = UF lesion load in cc; %UF = UF lesion load in %. Med=median, Mea=mean, SD=standard deviation.

| G          | Mo_P        | Age_T       | RCPM        | WPM         | %CIU        | CIU/m       | BNT%        | BDAE-R     | Les_V        | AF_Vol     | %AF         | EMC_V      | %EMC        | UF_V       | %UF         |
|------------|-------------|-------------|-------------|-------------|-------------|-------------|-------------|------------|--------------|------------|-------------|------------|-------------|------------|-------------|
|            | [mo]        | [y]         | [%]         |             |             |             | [%]         | max=10     | [cc]         | [cc]       |             | [cc]       |             | [cc]       |             |
| M          | 16          | 50.7        | 97.2        | 21.2        | 51.9        | 11.0        | 95.4        | 6          | 61.8         | 4.9        | 31.2        | 0.15       | 1.4         | 0.00       | 0.0         |
| M          | 15          | 44.8        | 88.9        | 24.3        | 3.3         | 0.8         | 31.7        | 1          | 246.2        | 12.3       | 78.0        | 1.81       | 16.8        | 3.51       | 26.0        |
| M          | 13          | 61.1        | 97.2        | 59.4        | 72.1        | 42.8        | 100         | 10         | 14.0         | 0.2        | 1.3         | 0.00       | 0.0         | 0.00       | 0.0         |
| M          | 14          | 70.9        | 80.6        | 8.0         | 31.3        | 2.5         | 56.7        | 1          | 113.1        | 7.0        | 44.5        | 4.29       | 39.9        | 2.08       | 15.4        |
| M          | 67          | 70.7        | 55.6        | 13.6        | 8.4         | 1.1         | 27.9        | 10         | 245.4        | 8.6        | 54.7        | 5.44       | 50.7        | 5.68       | 42.0        |
| F          | 12          | 74.6        | 66.7        | 11.8        | 9.6         | 1.1         | 45.0        | 8          | 112.6        | 7.7        | 49.0        | 0.01       | 0.1         | 0.01       | 0.1         |
| M          | 26          | 67.4        | 58.3        | 44.5        | 72.9        | 32.5        | 78.3        | 7          | 17.1         | 0.1        | 0.6         | 0.07       | 0.6         | 0.02       | 0.2         |
| M          | 65          | 74.3        | 94.4        | 25.1        | 71.5        | 17.9        | 93.3        | 9          | 55.4         | 6.2        | 39.0        | 1.16       | 10.8        | 1.14       | 8.5         |
| M          | 13          | 47.5        | 91.7        | 9.8         | 41.0        | 4.0         | 77.9        | 7          | 154.8        | 7.6        | 48.3        | 5.70       | 53.2        | 3.42       | 25.3        |
| M          | 11          | 45.3        | 100         | 30.8        | 87.5        | 26.9        | 100         | 10         | 35.5         | 0.9        | 5.6         | 0.28       | 2.6         | 0.04       | 0.3         |
| F          | 11          | 63.3        | 55.6        | 3.1         | 11.6        | 0.4         | 20.8        | 1          | 238.3        | 8.8        | 55.9        | 5.12       | 47.7        | 3.01       | 22.3        |
| M          | 27          | 66.1        | 94.4        | 13.0        | 31.8        | 4.1         | 66.7        | 4          | 297.3        | 9.7        | 61.7        | 6.38       | 59.4        | 9.04       | 66.9        |
| F          | 64          | 54.9        | 83.3        | 8.1         | 24.6        | 2.0         | 28.3        | 4          | 295.7        | 14.8       | 93.6        | 8.66       | 80.8        | 8.75       | 64.8        |
| F          | 12          | 47.9        | 83.3        | 7.5         | 11.1        | 0.8         | 13.3        | 1          | 325.8        | 14.1       | 88.9        | 7.23       | 67.4        | 5.97       | 44.2        |
| M          | 11          | 55.7        | 86.1        | 9.1         | 25.5        | 2.4         | 48.8        | 4          | 258.5        | 13.9       | 88.2        | 5.95       | 55.5        | 6.88       | 50.9        |
| M          | 16          | 56.1        | 72.2        | 13.6        | 20.2        | 2.8         | 67.9        | 4          | 87.5         | 7.4        | 46.7        | 4.00       | 37.3        | 2.65       | 19.6        |
| M          | 46          | 44.4        | 97.2        | 20.2        | 44.9        | 9.1         | 94.6        | 7          | 305.3        | 12.9       | 81.6        | 5.30       | 49.4        | 5.09       | 37.7        |
| F          | 96          | 71.2        | 69.4        | 2.3         | 29.4        | 0.7         | 11.9        | 0          | 190.3        | 10.5       | 66.6        | 3.88       | 36.2        | 2.78       | 20.6        |
| M          | 81          | 62.1        | 97.2        | 30.3        | 12.9        | 3.9         | 17.5        | 1          | 143.3        | 11.0       | 69.5        | 4.29       | 40.0        | 4.02       | 29.7        |
| M          | 25          | 62.5        | 83.3        | 25.6        | 8.7         | 2.2         | 29.2        | 5          | 177.2        | 9.0        | 56.7        | 4.89       | 45.6        | 4.99       | 36.9        |
| M          | 79          | 56.1        | 94.4        | 33.7        | 33.1        | 11.2        | 88.3        | 8          | 121.1        | 8.5        | 53.6        | 5.52       | 51.5        | 5.42       | 40.1        |
| M          | 57          | 58.4        | 94.4        | 12.9        | 14.1        | 1.8         | 66.7        | 8          | 152.2        | 11.2       | 71.2        | 2.01       | 18.7        | 3.82       | 28.3        |
| M          | 12          | 68.6        | 58.3        | 15.1        | 15.9        | 2.4         | 40.0        | 2          | 135.0        | 8.3        | 52.7        | 0.08       | 0.7         | 0.01       | 0.1         |
| M          | 21          | 56.3        | 77.8        | 27.8        | 5.4         | 1.5         | 21.7        | 2          | 185.1        | 10.0       | 63.2        | 4.24       | 39.5        | 3.13       | 23.2        |
| M          | 18          | 47.7        | 75.0        | 22.6        | 18.6        | 4.2         | 35.4        | 4          | 241.4        | 10.3       | 65.3        | 0.21       | 1.9         | 0.01       | 0.0         |
| M          | 79          | 61.7        | 72.2        | 55.9        | 67.7        | 37.9        | 86.3        | 8          | 147.9        | 4.0        | 25.4        | 0.01       | 0.1         | 0.00       | 0.0         |
| M          | 12          | 35.6        | 97.2        | 5.8         | 18.6        | 1.1         | 55.8        | 1          | 201.2        | 7.7        | 48.7        | 3.16       | 29.4        | 1.60       | 11.8        |
| F          | 17          | 51.0        | 94.4        | 37.6        | 19.0        | 7.2         | 28.8        | 1          | 233.1        | 10.9       | 69.0        | 7.00       | 65.2        | 5.62       | 41.6        |
| M          | 22          | 62.9        | 88.9        | 3.8         | 6.7         | 0.3         | 48.3        | 5          | 86.1         | 7.3        | 46.2        | 2.03       | 18.9        | 1.06       | 7.8         |
| M          | 92          | 64.2        | 100.0       | 34.6        | 62.1        | 21.5        | 97.5        | 9          | 50.3         | 4.4        | 27.8        | 2.07       | 19.3        | 1.40       | 10.4        |
| <b>MED</b> | <b>19.5</b> | <b>59.7</b> | <b>87.5</b> | <b>17.6</b> | <b>22.4</b> | <b>2.6</b>  | <b>52.3</b> | <b>4.5</b> | <b>153.5</b> | <b>8.6</b> | <b>54.1</b> | <b>3.9</b> | <b>36.7</b> | <b>2.9</b> | <b>21.4</b> |
| <b>MEA</b> | <b>35.0</b> | <b>58.5</b> | <b>83.5</b> | <b>21.0</b> | <b>31.0</b> | <b>8.6</b>  | <b>55.8</b> | <b>4.9</b> | <b>164.3</b> | <b>8.3</b> | <b>52.8</b> | <b>3.4</b> | <b>31.4</b> | <b>3.0</b> | <b>22.5</b> |
| <b>SD</b>  | <b>28.7</b> | <b>10.0</b> | <b>14.2</b> | <b>15.0</b> | <b>24.3</b> | <b>11.9</b> | <b>29.7</b> | <b>3.3</b> | <b>90.8</b>  | <b>3.8</b> | <b>24.2</b> | <b>2.6</b> | <b>24.3</b> | <b>2.7</b> | <b>19.8</b> |
